# Supplementary material for: Optimized active layer morphology toward efficient and polymer batch insensitive organic solar cells
Source: PubMed Central journal article supplement (PMC7275072; doi:10.1038/s41467-020-16621-x), 2020-06-05
Supplement: 41467_2020_16621_MOESM3_ESM.pdf [file 41467_2020_16621_MOESM3_ESM.pdf]

## Solar Cells Reporting Summary

Nature Research wishes to improve the reproducibility of the work that we publish. This form is intended for publication with all accepted papers reporting the characterization of photovoltaic devices and provides structure for consistency and transparency in reporting. Some list items might not apply to an individual manuscript, but all fields must be completed for clarity.

For further information on Nature Research policies, including our [data availability policy](#), see [Authors & Referees](#).

## ~ Experimental design

## Please check: are the following details reported in the manuscript?

## 1. Dimensions

|                                          |                                         |                                                                                                            |
|------------------------------------------|-----------------------------------------|------------------------------------------------------------------------------------------------------------|
| Area of the tested solar cells           | <input checked="" type="checkbox"/> Yes | Section "OSC device fabrication and measurement"                                                           |
|                                          | <input type="checkbox"/> No             | <i>Explain why this information is not reported/not relevant.</i>                                          |
| Method used to determine the device area | <input checked="" type="checkbox"/> Yes | The electronic active area of the cell is defined by the overlap of the ITO electrode and metal electrode. |
|                                          | <input type="checkbox"/> No             | <i>Explain why this information is not reported/not relevant.</i>                                          |

## 2. Current-voltage characterization

|                                                                                                                                                                                                |                                         |                                                                                                                                                                        |
|------------------------------------------------------------------------------------------------------------------------------------------------------------------------------------------------|-----------------------------------------|------------------------------------------------------------------------------------------------------------------------------------------------------------------------|
| Current density-voltage (J-V) plots in both forward and backward direction                                                                                                                     | <input type="checkbox"/> Yes            | <i>State where this information can be found in the text.</i>                                                                                                          |
|                                                                                                                                                                                                | <input checked="" type="checkbox"/> No  | Generally, organic photovoltaic devices do not have forward and backward problems. And we only scan the device in forward direction.                                   |
| Voltage scan conditions<br><i>For instance: scan direction, speed, dwell times</i>                                                                                                             | <input checked="" type="checkbox"/> Yes | Section "OSC device fabrication and measurement"                                                                                                                       |
|                                                                                                                                                                                                | <input type="checkbox"/> No             | <i>Explain why this information is not reported/not relevant.</i>                                                                                                      |
| Test environment<br><i>For instance: characterization temperature, in air or in glove box</i>                                                                                                  | <input checked="" type="checkbox"/> Yes | Our devices were characterized at room temperature (ca. 25 Celsius degree) in glove box.                                                                               |
|                                                                                                                                                                                                | <input type="checkbox"/> No             | <i>Explain why this information is not reported/not relevant.</i>                                                                                                      |
| Protocol for preconditioning of the device before its characterization                                                                                                                         | <input type="checkbox"/> Yes            | <i>State where this information can be found in the text.</i>                                                                                                          |
|                                                                                                                                                                                                | <input checked="" type="checkbox"/> No  | No preconditioning protocol                                                                                                                                            |
| Stability of the J-V characteristic<br><i>Verified with time evolution of the maximum power point or with the photocurrent at maximum power point; see <a href="#">ref. 7</a> for details.</i> | <input type="checkbox"/> Yes            | No hysteresis or other unusual behaviour was observed during the characterization of the solar cells. In general, organic solar cells do not have hysteresis problems. |
|                                                                                                                                                                                                | <input checked="" type="checkbox"/> No  | We only tested the long-term stability.                                                                                                                                |

## 3. Hysteresis or any other unusual behaviour

|                                                                           |                                        |                                                                                                                                                                        |
|---------------------------------------------------------------------------|----------------------------------------|------------------------------------------------------------------------------------------------------------------------------------------------------------------------|
| Description of the unusual behaviour observed during the characterization | <input type="checkbox"/> Yes           | <i>State where this information can be found in the text.</i>                                                                                                          |
|                                                                           | <input checked="" type="checkbox"/> No | No hysteresis or other unusual behaviour was observed during the characterization of the solar cells. In general, organic solar cells do not have hysteresis problems. |
| Related experimental data                                                 | <input type="checkbox"/> Yes           | <i>State where this information can be found in the text.</i>                                                                                                          |
|                                                                           | <input checked="" type="checkbox"/> No | No hysteresis or other unusual behaviour was observed during the characterization of the solar cells.                                                                  |

## 4. Efficiency

|                                                                                                                                 |                                         |                                                                                                                                                                                      |
|---------------------------------------------------------------------------------------------------------------------------------|-----------------------------------------|--------------------------------------------------------------------------------------------------------------------------------------------------------------------------------------|
| External quantum efficiency (EQE) or incident photons to current efficiency (IPCE)                                              | <input checked="" type="checkbox"/> Yes | The external quantum efficiency (EQE) spectra of OSCs are recorded using Enli QE-R3011 (Enli Technology Co., Ltd Taiwan).                                                            |
|                                                                                                                                 | <input type="checkbox"/> No             | <i>Explain why this information is not reported/not relevant.</i>                                                                                                                    |
| A comparison between the integrated response under the standard reference spectrum and the response measure under the simulator | <input checked="" type="checkbox"/> Yes | There are less than 5% errors between the integrated response under the standard reference spectrum and the response measure under the simulator. We give details in the manuscript. |
|                                                                                                                                 | <input type="checkbox"/> No             | <i>Explain why this information is not reported/not relevant.</i>                                                                                                                    |

|                                                                                                                                                                                               |                                                                        |                                                                                                                                                                                                                                                                                                                      |
|-----------------------------------------------------------------------------------------------------------------------------------------------------------------------------------------------|------------------------------------------------------------------------|----------------------------------------------------------------------------------------------------------------------------------------------------------------------------------------------------------------------------------------------------------------------------------------------------------------------|
| For tandem solar cells, the bias illumination and bias voltage used for each subcell                                                                                                          | <input type="checkbox"/> Yes<br><input checked="" type="checkbox"/> No | <input type="text" value="State where this information can be found in the text."/><br><input type="text" value="We only fabricated single junction solar cells."/>                                                                                                                                                  |
| <b>5. Calibration</b>                                                                                                                                                                         |                                                                        |                                                                                                                                                                                                                                                                                                                      |
| Light source and reference cell or sensor used for the characterization                                                                                                                       | <input checked="" type="checkbox"/> Yes<br><input type="checkbox"/> No | <input type="text" value="Section 'OSC device fabrication and measurement'"/><br><input type="text" value="Explain why this information is not reported/not relevant."/>                                                                                                                                             |
| Confirmation that the reference cell was calibrated and certified                                                                                                                             | <input checked="" type="checkbox"/> Yes<br><input type="checkbox"/> No | <input type="text" value="Section 'OSC device fabrication and measurement'"/><br><input type="text" value="Explain why this information is not reported/not relevant."/>                                                                                                                                             |
| Calculation of spectral mismatch between the reference cell and the devices under test                                                                                                        | <input checked="" type="checkbox"/> Yes<br><input type="checkbox"/> No | <input type="text" value="The relative expanded uncertainty resulting of the relative combined standard uncertainty multiplied with a coverage factor k = 2 is specified. It corresponds to a level of confidence of 95%."/><br><input type="text" value="We do not have the detailed information for the method."/> |
| <b>6. Mask/aperture</b>                                                                                                                                                                       |                                                                        |                                                                                                                                                                                                                                                                                                                      |
| Size of the mask/aperture used during testing                                                                                                                                                 | <input type="checkbox"/> Yes<br><input checked="" type="checkbox"/> No | <input type="text" value="State where this information can be found in the text."/><br><input type="text" value="We did not use a mask during testing and the device effective area was obtained by its crossed area of the bottom and top electrodes."/>                                                            |
| Variation of the measured short-circuit current density with the mask/aperture area                                                                                                           | <input type="checkbox"/> Yes<br><input checked="" type="checkbox"/> No | <input type="text" value="State where this information can be found in the text."/><br><input type="text" value="We did not use a mask during testing."/>                                                                                                                                                            |
| <b>7. Performance certification</b>                                                                                                                                                           |                                                                        |                                                                                                                                                                                                                                                                                                                      |
| Identity of the independent certification laboratory that confirmed the photovoltaic performance                                                                                              | <input checked="" type="checkbox"/> Yes<br><input type="checkbox"/> No | <input type="text" value="The PCE was certified by NIM, China, using a 3.152 mm2 mask."/>                                                                                                                                                                                                                            |
| A copy of any certificate(s)<br><i>Provide in Supplementary Information</i>                                                                                                                   | <input checked="" type="checkbox"/> Yes<br><input type="checkbox"/> No | <input type="text" value="See 'Supplementary Fig. 5'."/>                                                                                                                                                                                                                                                             |
| <b>8. Statistics</b>                                                                                                                                                                          |                                                                        |                                                                                                                                                                                                                                                                                                                      |
| Number of solar cells tested                                                                                                                                                                  | <input checked="" type="checkbox"/> Yes<br><input type="checkbox"/> No | <input type="text" value="We have tested ten solar cells for each type of OSCs, and the average PCE of OSCs are obtained from ten independent cells."/><br><input type="text" value="Explain why this information is not reported/not relevant."/>                                                                   |
| Statistical analysis of the device performance                                                                                                                                                | <input checked="" type="checkbox"/> Yes<br><input type="checkbox"/> No | <input type="text" value="Statistical results of the devices are listed in Table 1,2 and Supplementary Table 1-9."/><br><input type="text" value="Explain why this information is not reported/not relevant."/>                                                                                                      |
| <b>9. Long-term stability analysis</b>                                                                                                                                                        |                                                                        |                                                                                                                                                                                                                                                                                                                      |
| Type of analysis, bias conditions and environmental conditions<br><i>For instance: illumination type, temperature, atmosphere humidity, encapsulation method, preconditioning temperature</i> | <input checked="" type="checkbox"/> Yes<br><input type="checkbox"/> No | <input type="text" value="See 'Supplementary Figure 6.'"/><br><input type="text" value="Explain why this information is not reported/not relevant."/>                                                                                                                                                                |
